# Supplementary material for: Separation of platelets by size in a microfluidic device based on controlled incremental filtration
Source: Royal Society of Chemistry journal article supplement (doi:10.1039/d3lc00842h), 2024-01-01
Supplement: d3lc00842h1.pdf [file d3lc00842h1.pdf]

## **Supporting Information**

### **Centrifugation-free separation of platelets by size in a microfluidic device based on controlled incremental filtration**

Mai T. P. Dinh,<sup>1</sup> Anton Mukhamedshin,<sup>1</sup> Kumar Abhishek,<sup>1</sup> Fong W. Lam,<sup>2</sup> Sean C. Gifford,<sup>3</sup>  
Sergey S. Shevkoplyas<sup>1,\*</sup>

<sup>1</sup> Department of Biomedical Engineering, University of Houston, Houston, TX 77204, USA

<sup>2</sup> Division of Pediatric Critical Care Medicine, Baylor College of Medicine, Houston, TX 77030,  
USA

<sup>3</sup> Halcyon Biomedical Incorporated, Friendswood, TX 77546, USA

\* Corresponding author: Sergey S. Shevkoplyas, Ph.D., University of Houston, Department of Biomedical Engineering, 3605 Cullen Blvd, Houston, TX 77204-5060; phone: +1 (713) 743-5696; fax: +1 (713) 743-0226; e-mail: [sshevkoplyas@uh.edu](mailto:sshevkoplyas@uh.edu)

Figure S1

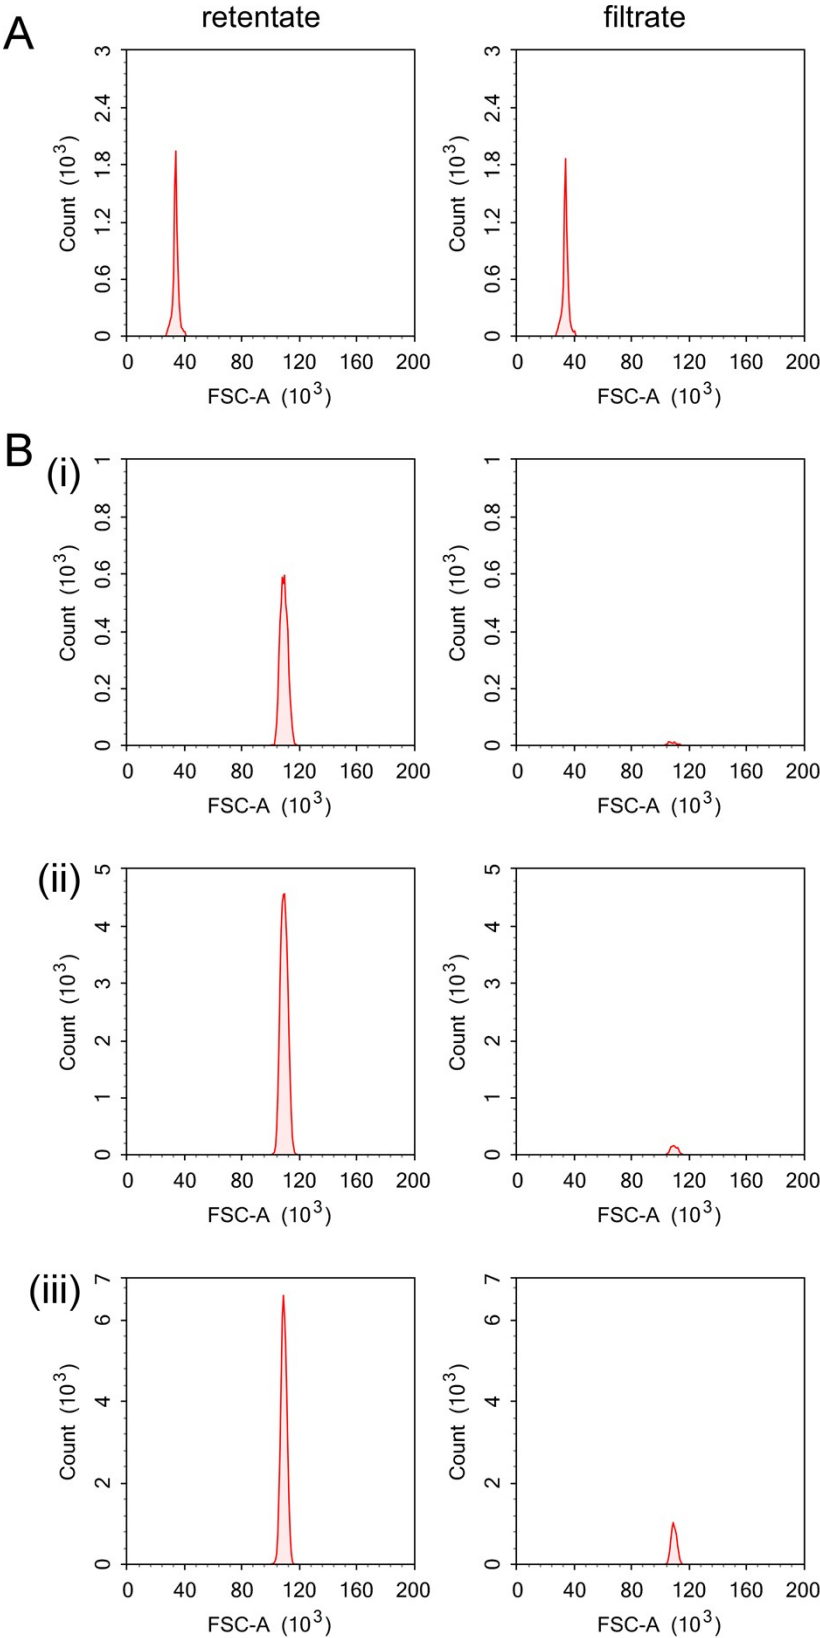

**Figure S1** Typical distribution of spherical beads between the retentate (left) and filtrate (right) for a CIF device ( $f_{gap}^* = 1.04 \times 10^{-4}$ ) operating at a flow rate of 30  $\mu\text{L}/\text{min}$ . **(A)** For small beads with nominal average diameter of 1  $\mu\text{m}$  and concentration of 213 beads/ $\mu\text{L}$  fluid volume recovery in filtrate was 52% and bead recovery in filtrate was 54%. **(B)** For large beads with nominal average diameter of 4.7  $\mu\text{m}$  recovery in filtrate depended on bead concentration. **(i)** Concentration: 106 beads/ $\mu\text{L}$ , fluid volume recovery in filtrate: 50%, bead recovery in filtrate: 1.8%. **(ii)** Concentration: 799 beads/ $\mu\text{L}$ , fluid volume recovery in filtrate: 52%, bead recovery in filtrate: 3.5%. **(iii)** Concentration: 1714 beads/ $\mu\text{L}$ , fluid volume recovery in filtrate: 48%, bead recovery in filtrate: 6.8%.

**Figure S2**

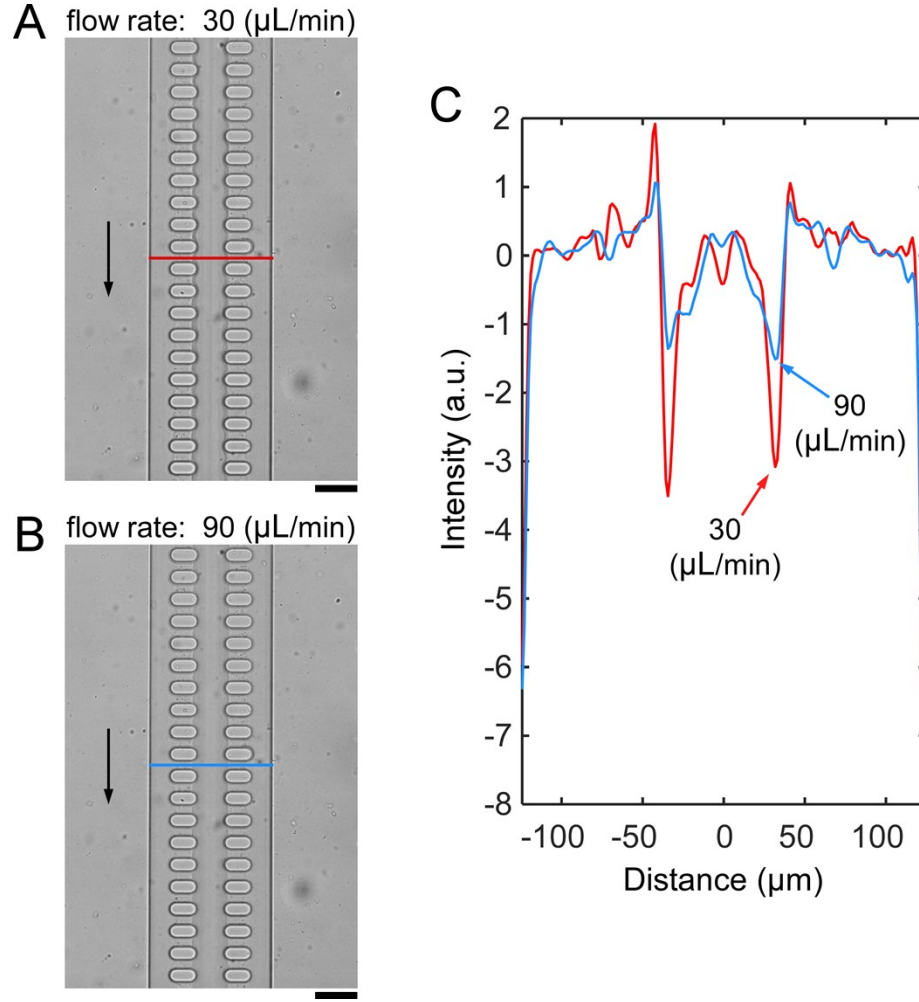

**Figure S2** Effect of flow rate on accumulation of retained PLTs. (A) Image of a CIF device ( $f_{gap}^* = 1.04 \times 10^{-4}$ ) operating at a flow rate of 30  $\mu\text{L}/\text{min}$ . (B) Image of the same device processing the same sample of undiluted PRP at a flow rate of 90  $\mu\text{L}/\text{min}$ . Identical imaging conditions were used to capture both images. Arrows indicate the direction of flow. Scale bars are 100  $\mu\text{m}$ . (C) Average intensity profiles across the middle channel (red: 30  $\mu\text{L}/\text{min}$ , blue: 90  $\mu\text{L}/\text{min}$ ).

**Figure S3**

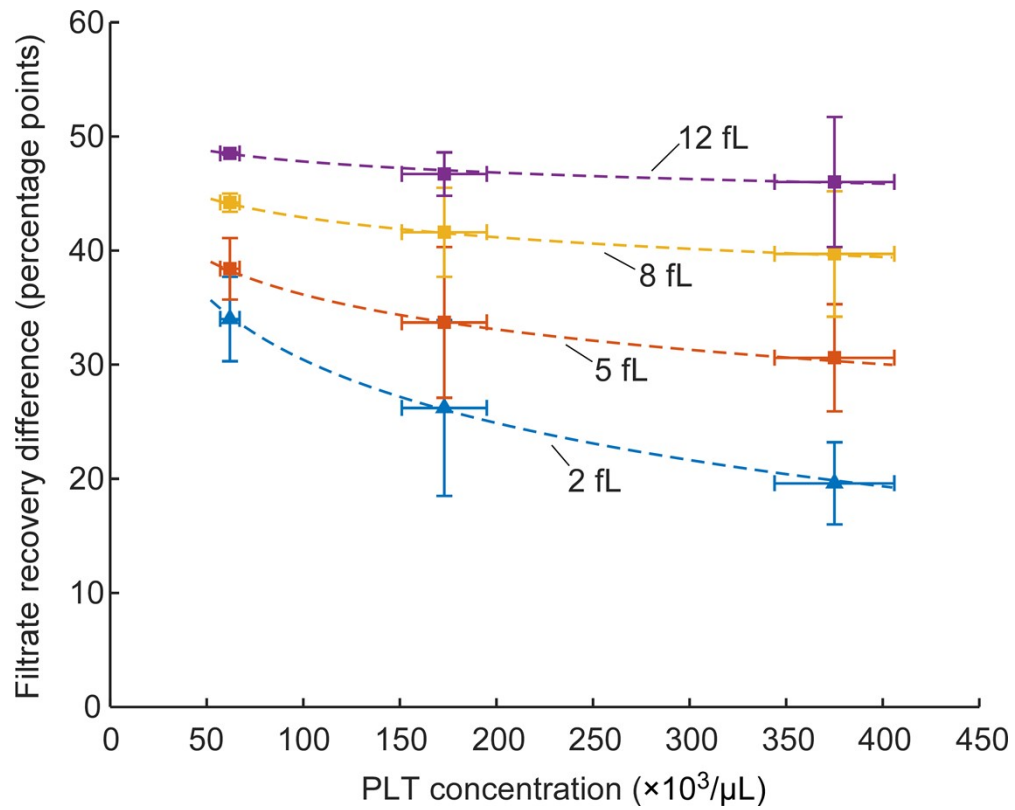

**Figure S3** Dependence of the filtrate recovery difference on PLT concentration in the input sample for PLTs with different cell volumes. Values are shown as mean  $\pm$  standard deviation ( $n = 3$  subjects). Dashed lines indicate best fit curves (2 fL:  $y = -8 \cdot \ln(x) + 67.26$ ,  $R^2 = 0.9987$ ; 5 fL:  $y = -4.4 \cdot \ln(x) + 56.39$ ,  $R^2 = 0.999$ ; 8 fL:  $y = -2.5 \cdot \ln(x) + 54.4$ ,  $R^2 = 1.000$ ; 12 fL:  $y = -1.4 \cdot \ln(x) + 54.24$ ,  $R^2 = 0.9782$ ).
